# Supplementary material
Source: publisher figshare collection journal article supplement (https://acs.figshare.com/ndownloader/files/13756142)
Supplement: Supplementary file 1 [file 13756142]

## Sheet: Sheet1
#	Resi1	Resi2	Resi1	Resi2	Additive	Assembly	Heat	E (Add - Assembly)
4100	73	74	D	C	0.36	-2.19	-0.72	-2.55
535	71	73	C	Q	0.25	-2.19	-0.66	-2.44
3901	72	76	W	F	0.11	-2.19	-0.74	-2.3
458	71	73	A	Y	0.09	-2.19	-0.84	-2.28
3902	72	76	W	Y	0.03	-2.19	0	-2.22
4928	73	76	V	L	0.85	-1.02	-0.68	-1.87
4037	73	74	V	C	0.47	-1.32	-2.42	-1.79
4927	73	76	V	I	0.78	-0.99	-0.8	-1.77
2527	72	73	F	D	0.62	-0.86	-0.05	-1.48
4930	73	76	V	F	0.44	-0.98	-1.12	-1.42
352	71	72	Y	F	0.38	-1	-0.4	-1.38
5830	74	76	C	I	0.01	-1.36	-2.42	-1.37
763	71	73	F	D	0.62	-0.75	-0.18	-1.37
5831	74	76	C	L	0.09	-1.27	-0.9	-1.36
517	71	73	V	I	0.1	-1.22	-0.57	-1.32
4931	73	76	V	Y	0.36	-0.96	-0.68	-1.32
4890	73	76	S	W	0.01	-1.29	-0.89	-1.3
4918	73	76	V	V	0.61	-0.67	-0.54	-1.28
4016	73	74	T	C	0.16	-1.09	-1.61	-1.25
3857	72	76	F	L	0.36	-0.88	-0.56	-1.24
5138	73	76	L	L	0.26	-0.96	-0.76	-1.22
331	71	72	F	F	0.23	-0.97	-0.65	-1.2
4932	73	76	V	W	0.26	-0.92	-1.54	-1.18
1925	71	76	K	L	0.59	-0.59	-0.89	-1.18
4910	73	76	T	Y	0.05	-1.09	-0.46	-1.14
2882	72	74	M	C	0.17	-0.97	-0.54	-1.14
100	71	72	C	F	0.41	-0.72	-0.27	-1.13
3008	72	74	W	C	0.14	-0.98	-1.23	-1.12
2548	72	73	Y	D	0.53	-0.58	-0.21	-1.11
950	71	74	V	C	0.37	-0.72	-0.88	-1.09
2442	72	73	M	E	0.66	-0.42	-0.35	-1.08
3856	72	76	F	I	0.28	-0.8	-0.52	-1.08
3898	72	76	W	I	0.45	-0.62	-0.27	-1.07
4906	73	76	T	I	0.47	-0.6	-0.35	-1.07
637	71	73	Q	D	0.55	-0.49	-2.42	-1.04
5822	74	76	C	C	0.25	-0.77	-1.02	-1.02
5137	73	76	L	I	0.19	-0.83	-0.66	-1.02
4929	73	76	V	H	0.65	-0.36	-0.24	-1.01
1924	71	76	K	I	0.51	-0.49	-0.82	-1
4550	73	75	D	L	0.29	-0.71	-0.73	-1
5180	73	76	F	L	0.2	-0.8	-0.73	-1
4969	73	76	E	I	0.51	-0.47	-0.01	-0.98
289	71	72	L	F	0.14	-0.83	-0.46	-0.97
4933	73	76	V	G	0.83	-0.13	-0.38	-0.96
1923	71	76	K	M	0.48	-0.47	-0.58	-0.95
447	71	73	A	E	0.54	-0.4	-0.07	-0.94
247	71	72	M	F	0.08	-0.86	-0.67	-0.94
4907	73	76	T	L	0.55	-0.37	-0.25	-0.92
4487	73	75	V	L	0.4	-0.51	-0.55	-0.91
3899	72	76	W	L	0.52	-0.39	-0.1	-0.91
37	71	72	S	F	0.43	-0.46	-0.42	-0.89
4042	73	74	V	Q	0.07	-0.79	-1.51	-0.86
4897	73	76	T	V	0.3	-0.56	-0.28	-0.86
2295	72	73	C	E	0.65	-0.21	-0.12	-0.86
4981	73	76	D	V	0.5	-0.36	0	-0.86
2544	72	73	Y	T	0.34	-0.5	-0.2	-0.84
1930	71	76	K	G	0.56	-0.27	-0.91	-0.83
3889	72	76	W	V	0.28	-0.55	-0.1	-0.83
4529	73	75	E	L	0.13	-0.7	-0.6	-0.83
679	71	73	M	D	0.47	-0.36	-0.04	-0.83
2251	72	73	T	V	0.8	-0.02	-0.07	-0.82
805	71	73	W	D	0.2	-0.62	-0.64	-0.82
3562	72	76	S	I	0.31	-0.51	-0.31	-0.82
12	71	72	A	M	0.52	-0.3	-0.06	-0.82
1927	71	76	K	F	0.18	-0.63	-0.98	-0.81
2439	72	73	M	T	0.63	-0.18	-0.06	-0.81
163	71	72	K	F	0.47	-0.32	-0.51	-0.79
16	71	72	A	F	0.31	-0.48	-0.2	-0.79
205	71	72	Q	F	0.16	-0.63	-0.29	-0.79
3541	72	76	A	I	0.31	-0.47	-0.31	-0.78
2209	72	73	A	V	0.76	-0.01	-0.24	-0.77
5179	73	76	F	I	0.13	-0.63	-1.07	-0.76
4352	73	74	G	C	0.19	-0.56	-0.93	-0.75
2092	71	76	F	I	0.27	-0.48	-0.66	-0.75
1139	71	74	I	C	0.05	-0.7	-0.54	-0.75
3995	73	74	S	C	0.22	-0.52	-0.87	-0.74
2090	71	76	F	N	0.4	-0.34	-0.4	-0.74
6461	75	76	L	L	0.02	-0.72	-0.57	-0.74
1922	71	76	K	N	0.64	-0.09	-0.64	-0.73
2116	71	76	Y	F	0.09	-0.64	-1.04	-0.73
226	71	72	N	F	0.26	-0.47	-0.07	-0.73
5136	73	76	L	M	0.15	-0.58	-0.15	-0.73
804	71	73	W	E	0.04	-0.68	-0.59	-0.72
4909	73	76	T	F	0.13	-0.58	-1.21	-0.71
2232	72	73	S	E	0.5	-0.2	-0.03	-0.7
310	71	72	H	F	0.2	-0.5	-0.12	-0.7
3835	72	76	H	I	0.07	-0.63	-0.19	-0.7
1915	71	76	K	V	0.35	-0.34	-0.88	-0.69
1777	71	76	A	I	0.36	-0.32	-0.1	-0.68
5200	73	76	Y	I	0.06	-0.62	-0.19	-0.68
5171	73	76	F	C	0.36	-0.31	-0.72	-0.67
520	71	73	V	F	0.48	-0.18	-0.15	-0.66
929	71	74	T	C	0.24	-0.41	-0.79	-0.65
2419	72	73	N	V	0.49	-0.15	-0.25	-0.64
514	71	73	V	Q	0.48	-0.16	-0.15	-0.64
4549	73	75	D	I	0.35	-0.28	-0.24	-0.63
5096	73	76	M	L	0.19	-0.44	-0.19	-0.63
5380	74	75	C	V	0.08	-0.54	-1.32	-0.62
2086	71	76	F	D	0.08	-0.54	-0.75	-0.62
1845	71	76	V	W	0.16	-0.46	-0.43	-0.62
593	71	73	K	C	0.3	-0.31	-0.36	-0.61
5128	73	76	L	V	0.02	-0.59	-0.43	-0.61
2126	71	76	W	C	0.09	-0.51	-0.97	-0.6
5823	74	76	C	E	0.17	-0.42	-0.78	-0.59
5837	74	76	C	P	0.03	-0.55	-0.65	-0.58
5129	73	76	L	C	0.42	-0.16	-0.05	-0.58
2093	71	76	F	L	0.35	-0.2	-1.23	-0.55
1918	71	76	K	D	0.32	-0.23	-0.24	-0.55
3628	72	76	C	F	0.13	-0.42	-0.36	-0.55
908	71	74	S	C	0.16	-0.36	-0.72	-0.52
444	71	73	A	T	0.5	-0.02	-0.21	-0.52
2029	71	76	I	I	0.36	-0.16	-0.18	-0.52
2050	71	76	L	I	0.19	-0.33	-0.11	-0.52
2735	72	74	C	C	0.16	-0.34	-0.7	-0.5
2211	72	73	A	E	0.49	-0.01	-0.07	-0.5
633	71	73	Q	T	0.35	-0.15	-0.09	-0.5
802	71	73	W	V	0.31	-0.18	-0.4	-0.49
597	71	73	K	R	0.37	-0.12	-0.29	-0.49
4908	73	76	T	H	0.34	-0.14	-0.03	-0.48
1914	71	76	K	T	0.32	-0.15	-0.85	-0.47
2113	71	76	Y	I	0.42	-0.05	-0.43	-0.47
2115	71	76	Y	H	0.3	-0.17	-0.12	-0.47
1379	71	75	T	L	0.17	-0.3	-0.11	-0.47
1034	71	74	K	C	0.2	-0.25	-0.42	-0.45
2924	72	74	L	C	0.03	-0.41	-0.99	-0.44
5178	73	76	F	M	0.09	-0.34	-0.28	-0.43
4493	73	75	V	P	0.25	-0.18	-0.91	-0.43
2474	72	73	I	Y	0.08	-0.35	-0.4	-0.43
2693	72	74	T	C	0.04	-0.39	-0.18	-0.43
4802	73	75	G	L	0.12	-0.31	-0.07	-0.43
6453	75	76	L	E	0.1	-0.31	-0.08	-0.41
667	71	73	N	F	0.1	-0.31	-0.07	-0.41
1784	71	76	A	P	0.37	-0.04	-0.31	-0.41
2091	71	76	F	M	0.24	-0.16	-0.63	-0.4
604	71	73	K	F	0.32	-0.08	-0.4	-0.4
596	71	73	K	K	0.27	-0.13	-0.23	-0.4
5150	73	76	H	C	0.36	-0.04	0	-0.4
1223	71	74	Y	C	0.12	-0.27	-0.84	-0.39
4079	73	74	E	C	0.2	-0.18	-0.43	-0.38
5095	73	76	M	I	0.11	-0.27	-0.07	-0.38
5836	74	76	C	G	0.06	-0.31	-0.76	-0.37
4922	73	76	V	K	0.11	-0.26	-0.49	-0.37
3627	72	76	C	H	0.34	-0.02	-0.15	-0.36
3185	72	75	C	L	0.09	-0.25	-0.07	-0.34
5176	73	76	F	Q	0.2	-0.12	-0.46	-0.32
2536	72	73	F	F	0.08	-0.24	-0.24	-0.32
1484	71	75	K	L	0.14	-0.18	-0.1	-0.32
3659	72	76	D	C	0.08	-0.23	-0.84	-0.31
772	71	73	F	F	0.08	-0.22	-0.38	-0.3
537	71	73	C	M	0.24	-0.06	-0.01	-0.3
5213	73	76	W	C	0.11	-0.17	-0.51	-0.28
3847	72	76	F	V	0.11	-0.17	-0.25	-0.28
5818	74	76	C	A	0.02	-0.26	-0.32	-0.28
1946	71	76	R	L	0.01	-0.24	-0.98	-0.25
2590	72	73	G	D	0.1	-0.15	-0.82	-0.25
543	71	73	C	W	0.01	-0.23	-1.04	-0.24
5828	74	76	C	N	0.14	-0.1	-0.21	-0.24
606	71	73	K	W	0.07	-0.15	-2.42	-0.22
2317	72	73	E	D	0.11	-0.11	-0.28	-0.22
4466	73	75	T	L	0.09	-0.12	-0.23	-0.21
1824	71	76	T	W	0.03	-0.17	-0.55	-0.2
5186	73	76	F	P	0.14	-0.06	-0.43	-0.2
1771	71	76	A	D	0.16	-0.04	-0.1	-0.2
2032	71	76	I	F	0.02	-0.17	-1.25	-0.19
823	71	73	G	V	0.05	-0.14	-1.09	-0.19
1928	71	76	K	Y	0.1	-0.09	-0.32	-0.19
709	71	73	I	F	0.16	-0.02	-0.24	-0.18
5827	74	76	C	Q	0.09	-0.08	-2.42	-0.17
2083	71	76	F	V	0.11	-0.06	-0.46	-0.17
4556	73	75	D	P	0.14	-0.02	-1.11	-0.16
3751	72	76	N	I	0.04	-0.12	-0.07	-0.16
5018	73	76	K	P	0.09	-0.06	-0.01	-0.15
2052	71	76	L	H	0.06	-0.09	-0.02	-0.15
2127	71	76	W	E	0.01	-0.13	-0.04	-0.14
2611	72	73	P	D	0.06	-0.06	-0.39	-0.12
2903	72	74	I	C	0.03	-0.08	-0.49	-0.11
4488	73	75	V	H	0.04	-0.06	-0.96	-0.1
1942	71	76	R	Q	0.01	-0.09	-0.93	-0.1
5168	73	76	F	S	0.05	-0.03	-0.25	-0.08
49	71	72	T	D	0.08	0	-0.11	-0.08
5000	73	76	K	S	0.01	-0.05	-0.02	-0.06
646	71	73	Q	F	0.01	-0.04	-0.13	-0.05
4451	73	75	S	P	0.01	-0.03	-1.29	-0.04
752	71	73	H	Y	-0.02	0.02	0.46	0.04
2549	72	73	Y	K	-0.06	0.03	0.31	0.09
688	71	73	M	F	-0.07	0.03	0.19	0.1
61	71	72	T	G	-0.01	0.1	0.01	0.11
2312	72	73	E	S	-0.02	0.09	0.02	0.11
5189	73	76	Y	S	-0.01	0.1	0.1	0.11
4771	73	75	W	V	-0.05	0.06	0.09	0.11
677	71	73	M	C	-0.09	0.02	0.3	0.11
326	71	72	F	N	-0.01	0.11	0.43	0.12
1990	71	76	N	F	-0.04	0.09	0.4	0.13
6127	74	76	G	F	-0.04	0.09	0.46	0.13
724	71	73	L	Q	-0.02	0.12	0.39	0.14
5127	73	76	L	T	-0.01	0.13	0.25	0.14
5086	73	76	M	V	-0.06	0.09	0.33	0.15
181	71	72	R	I	-0.04	0.11	0.37	0.15
730	71	73	L	F	-0.01	0.14	0.04	0.15
1631	71	75	H	L	-0.13	0.03	0.24	0.16
2269	72	73	V	A	-0.05	0.11	0.34	0.16
3121	72	75	S	I	0	0.16	0.47	0.16
647	71	73	Q	Y	-0.06	0.11	0.26	0.17
2602	72	73	G	G	-0.07	0.1	0.01	0.17
5131	73	76	L	D	-0.01	0.16	0.32	0.17
2244	72	73	S	W	-0.13	0.05	0.21	0.18
2508	72	73	H	R	-0.08	0.11	0.22	0.19
689	71	73	M	Y	-0.14	0.05	0.27	0.19
2424	72	73	N	R	-0.11	0.08	0.33	0.19
3860	72	76	F	Y	-0.14	0.06	0.05	0.2
5085	73	76	M	T	-0.09	0.11	0.21	0.2
5078	73	76	N	Y	-0.03	0.17	0.49	0.2
2511	72	73	H	M	-0.15	0.05	0.43	0.2
4666	73	75	I	V	-0.19	0.02	0.06	0.21
2223	72	73	A	W	-0.13	0.08	0.29	0.21
4696	73	75	L	I	-0.13	0.08	0.33	0.21
638	71	73	Q	K	-0.04	0.17	0.65	0.21
3638	72	76	E	C	0	0.22	0.29	0.22
3268	72	75	R	I	-0.06	0.16	0.38	0.22
2513	72	73	H	L	-0.07	0.15	0.47	0.22
2427	72	73	N	M	-0.18	0.04	0.39	0.22
6433	75	76	I	D	-0.19	0.03	0.4	0.22
3818	72	76	L	Y	-0.08	0.14	0.25	0.22
271	71	72	I	G	-0.2	0.03	0.01	0.23
2033	71	76	I	Y	-0.06	0.17	0.41	0.23
246	71	72	M	H	-0.13	0.1	0.4	0.23
3825	72	76	H	T	-0.13	0.11	0.06	0.24
2342	72	73	D	N	-0.08	0.16	0.22	0.24
5161	73	76	H	F	-0.21	0.03	0.19	0.24
2282	72	73	V	L	-0.13	0.11	0.29	0.24
5173	73	76	F	D	-0.07	0.17	0.2	0.24
319	71	72	F	V	-0.04	0.21	0.42	0.25
5683	74	75	G	I	-0.02	0.23	0.49	0.25
2558	72	73	Y	Y	-0.08	0.17	0.47	0.25
5149	73	76	H	V	-0.04	0.21	0.56	0.25
5026	73	76	R	D	-0.02	0.24	0.38	0.26
214	71	72	N	V	-0.01	0.25	0.48	0.26
5194	73	76	Y	D	-0.14	0.12	0.37	0.26
3829	72	76	H	D	-0.13	0.13	0.45	0.26
216	71	72	N	E	-0.25	0.02	0.21	0.27
309	71	72	H	H	-0.01	0.26	0.46	0.27
5044	73	76	Q	V	-0.04	0.24	0.53	0.28
166	71	72	K	G	-0.05	0.23	0.17	0.28
6448	75	76	L	A	-0.05	0.23	0.53	0.28
5047	73	76	Q	D	-0.08	0.2	0.66	0.28
305	71	72	H	N	-0.04	0.25	0.37	0.29
4507	73	75	C	I	-0.21	0.08	0.5	0.29
799	71	73	W	A	-0.2	0.09	0.3	0.29
235	71	72	M	V	-0.19	0.1	0.32	0.29
2284	72	73	V	F	-0.19	0.11	0.11	0.3
4868	73	76	A	Y	-0.15	0.15	0.31	0.3
5043	73	76	Q	T	-0.08	0.22	0.52	0.3
242	71	72	M	N	-0.16	0.14	0.36	0.3
2280	72	73	V	M	-0.2	0.1	0.34	0.3
4986	73	76	D	R	-0.16	0.15	0.17	0.31
6128	74	76	G	Y	-0.12	0.19	0.36	0.31
3797	72	76	I	Y	-0.08	0.23	0.43	0.31
2728	72	74	V	G	-0.01	0.3	0.5	0.31
3587	72	76	T	Y	-0.07	0.24	0.48	0.31
3750	72	76	N	M	0	0.31	0.55	0.31
193	71	72	Q	V	-0.11	0.2	0.48	0.31
2321	72	73	E	N	-0.17	0.14	0.3	0.31
711	71	73	I	W	-0.08	0.24	0.17	0.32
3643	72	76	E	Q	-0.16	0.16	0.28	0.32
731	71	73	L	Y	-0.08	0.24	0.39	0.32
3824	72	76	H	S	0	0.32	0.49	0.32
4717	73	75	H	I	-0.19	0.13	0.31	0.32
729	71	73	L	H	-0.01	0.31	0.54	0.32
2430	72	73	N	H	-0.16	0.16	0.41	0.32
2278	72	73	V	Q	-0.19	0.13	0.42	0.32
1069	71	74	R	G	-0.09	0.24	0.42	0.33
5005	73	76	K	D	-0.12	0.21	0.41	0.33
103	71	72	C	G	-0.11	0.22	0.07	0.33
5035	73	76	R	F	-0.16	0.17	0.49	0.33
3644	72	76	E	N	-0.1	0.24	0.32	0.34
2012	71	76	M	Y	-0.29	0.05	0.18	0.34
3598	72	76	V	D	-0.19	0.15	0.34	0.34
2423	72	73	N	K	-0.21	0.13	0.48	0.34
5190	73	76	Y	T	-0.14	0.2	0.31	0.34
171	71	72	R	T	-0.04	0.31	0.43	0.35
1991	71	76	N	Y	-0.12	0.23	0.45	0.35
277	71	72	L	V	-0.13	0.22	0.45	0.35
288	71	72	L	H	-0.07	0.28	0.45	0.35
3661	72	76	D	D	-0.35	0.01	0.16	0.36
5001	73	76	K	T	-0.12	0.24	0.41	0.36
2551	72	73	Y	Q	-0.01	0.35	0.59	0.36
3593	72	76	V	S	-0.06	0.3	0.54	0.36
3545	72	76	A	Y	-0.11	0.25	0.52	0.36
3250	72	75	K	F	-0.29	0.07	0.36	0.36
3741	72	76	N	T	-0.16	0.21	0.16	0.37
196	71	72	Q	D	-0.27	0.1	0.15	0.37
284	71	72	L	N	-0.1	0.27	0.34	0.37
182	71	72	R	L	-0.04	0.33	0.44	0.37
4985	73	76	D	K	0	0.37	0.56	0.37
2285	72	73	V	Y	-0.26	0.11	0.31	0.37
2283	72	73	V	H	-0.19	0.18	0.4	0.37
2429	72	73	N	L	-0.1	0.27	0.53	0.37
640	71	73	Q	Q	0	0.37	0.7	0.37
3469	72	75	G	V	-0.18	0.2	0.09	0.38
3353	72	75	I	L	-0.04	0.34	0.54	0.38
2040	71	76	L	T	-0.01	0.37	0.62	0.38
3673	72	76	D	G	-0.1	0.29	0.05	0.39
178	71	72	R	Q	-0.04	0.36	0.5	0.4
3374	72	75	L	L	-0.04	0.36	0.55	0.4
3043	72	74	G	G	-0.27	0.13	0.03	0.4
3826	72	76	H	V	-0.1	0.3	0.25	0.4
2546	72	73	Y	C	-0.03	0.37	0.6	0.4
4612	73	75	Q	I	-0.19	0.21	0.5	0.4
4592	73	75	R	L	-0.2	0.2	0.52	0.4
3603	72	76	V	M	-0.02	0.39	0.65	0.41
1969	71	76	Q	F	-0.13	0.29	0.54	0.42
3753	72	76	N	H	-0.09	0.33	0.36	0.42
2277	72	73	V	R	-0.14	0.28	0.42	0.42
2516	72	73	H	Y	-0.2	0.22	0.4	0.42
2432	72	73	N	Y	-0.23	0.19	0.55	0.42
3606	72	76	V	H	-0.12	0.31	0.45	0.43
6441	75	76	I	H	-0.12	0.31	0.67	0.43
3595	72	76	V	V	-0.15	0.29	0.54	0.44
301	71	72	H	D	-0.23	0.21	0.01	0.44
4867	73	76	A	F	-0.07	0.37	0.19	0.44
1651	71	75	F	I	-0.04	0.4	0.55	0.44
3607	72	76	V	F	-0.33	0.11	0.45	0.44
4654	73	75	M	I	-0.21	0.24	0.05	0.45
2276	72	73	V	K	-0.24	0.21	0.39	0.45
2557	72	73	Y	F	-0.01	0.44	0.34	0.45
2075	71	76	H	Y	-0.18	0.27	0.25	0.45
3100	72	75	A	I	-0.01	0.44	0.57	0.45
2507	72	73	H	K	-0.18	0.27	0.43	0.45
5738	74	76	A	C	-0.32	0.14	0.02	0.46
2514	72	73	H	H	-0.13	0.33	0.55	0.46
1939	71	76	R	D	-0.26	0.2	0.45	0.46
569	71	73	D	S	-0.31	0.16	0.12	0.47
4964	73	76	E	K	-0.16	0.31	0.27	0.47
4942	73	76	C	D	-0.09	0.38	0.41	0.47
3163	72	75	V	I	-0.3	0.17	0.43	0.47
4718	73	75	H	L	-0.25	0.22	0.57	0.47
1999	71	76	M	V	-0.04	0.44	0.61	0.48
5022	73	76	R	T	-0.02	0.46	0.62	0.48
681	71	73	M	R	-0.02	0.46	0.69	0.48
3665	72	76	D	N	-0.02	0.47	0.6	0.49
3394	72	75	H	I	-0.25	0.24	0.44	0.49
3745	72	76	N	D	-0.16	0.33	0.59	0.49
5036	73	76	R	Y	-0.24	0.25	0.54	0.49
3634	72	76	E	A	-0.22	0.28	0.25	0.5
1781	71	76	A	Y	-0.06	0.44	0.6	0.5
3594	72	76	V	T	-0.19	0.31	0.58	0.5
170	71	72	R	S	-0.07	0.44	0.48	0.51
3648	72	76	E	H	-0.36	0.15	0.21	0.51
2273	72	73	V	C	-0.21	0.3	0.4	0.51
5148	73	76	H	T	-0.07	0.44	0.54	0.51
169	71	72	R	A	-0.08	0.43	0.58	0.51
610	71	73	R	A	-0.12	0.39	0.56	0.51
1609	71	75	L	I	-0.13	0.38	0.56	0.51
6438	75	76	I	M	-0.03	0.48	0.68	0.51
140	71	72	D	L	-0.5	0.01	0.3	0.51
2311	72	73	E	A	-0.29	0.23	0.3	0.52
3867	72	76	Y	T	-0.01	0.51	0.66	0.52
4571	73	75	K	L	-0.3	0.22	0.5	0.52
2425	72	73	N	Q	-0.17	0.35	0.66	0.52
3310	72	75	N	I	-0.28	0.25	0.45	0.53
2533	72	73	F	I	-0.3	0.23	0.48	0.53
3269	72	75	R	L	-0.12	0.41	0.67	0.53
2431	72	73	N	F	-0.16	0.37	0.85	0.53
3917	72	76	G	N	-0.12	0.42	0.06	0.54
719	71	73	L	C	-0.03	0.51	0.5	0.54
3145	72	75	T	F	-0.44	0.1	0.15	0.54
807	71	73	W	R	-0.29	0.26	0.17	0.55
4268	73	74	H	C	-0.18	0.37	0.35	0.55
2517	72	73	H	W	-0.37	0.18	0.25	0.55
4570	73	75	K	I	-0.24	0.31	0.52	0.55
2327	72	73	E	Y	-0.5	0.05	0.27	0.55
5055	73	76	Q	H	-0.01	0.54	0.82	0.55
5015	73	76	K	Y	-0.34	0.22	0.24	0.56
2340	72	73	D	R	-0.3	0.26	0.39	0.56
3740	72	76	N	S	-0.03	0.53	0.73	0.56
2554	72	73	Y	I	-0.39	0.17	0.49	0.56
5056	73	76	Q	F	-0.22	0.35	0.54	0.57
6443	75	76	I	Y	-0.41	0.16	0.37	0.57
3837	72	76	H	H	-0.06	0.51	0.11	0.57
1971	71	76	Q	W	-0.32	0.25	0.15	0.57
2325	72	73	E	H	-0.43	0.14	0.32	0.57
298	71	72	H	V	-0.07	0.5	0.75	0.57
2509	72	73	H	Q	-0.13	0.44	0.71	0.57
803	71	73	W	C	-0.36	0.22	0.02	0.58
1992	71	76	N	W	-0.22	0.36	0.41	0.58
621	71	73	R	M	-0.28	0.3	0.23	0.58
626	71	73	R	Y	-0.33	0.25	0.29	0.58
3635	72	76	E	S	-0.3	0.28	0.36	0.58
6449	75	76	L	S	-0.13	0.45	0.69	0.58
3376	72	75	L	F	-0.44	0.14	0.38	0.58
4423	73	75	A	I	-0.05	0.53	0.77	0.58
2319	72	73	E	R	-0.38	0.2	0.49	0.58
6428	75	76	I	S	-0.06	0.52	0.88	0.58
2320	72	73	E	Q	-0.43	0.16	0.06	0.59
5002	73	76	K	V	-0.09	0.5	0.68	0.59
2588	72	73	G	C	-0.46	0.13	0.03	0.59
185	71	72	R	Y	-0.2	0.39	0.4	0.59
1567	71	75	M	I	-0.19	0.4	1.01	0.59
3636	72	76	E	T	-0.43	0.17	0.08	0.6
5089	73	76	M	D	-0.09	0.51	0.44	0.6
6429	75	76	I	T	-0.19	0.41	0.67	0.6
5079	73	76	N	W	-0.13	0.48	0.37	0.61
1495	71	75	R	V	0	0.61	0.61	0.61
3608	72	76	V	Y	-0.41	0.2	0.38	0.61
1546	71	75	N	I	-0.01	0.6	0.93	0.61
2336	72	73	D	C	-0.36	0.26	0.18	0.62
2491	72	73	L	I	-0.24	0.38	0.54	0.62
2416	72	73	N	A	-0.02	0.6	0.97	0.62
2346	72	73	D	H	-0.34	0.28	0.38	0.62
6430	75	76	I	V	-0.16	0.47	0.74	0.63
2010	71	76	M	H	0	0.63	0.9	0.63
3664	72	76	D	Q	-0.07	0.57	0.21	0.64
4759	73	75	Y	I	-0.26	0.38	0.45	0.64
1693	71	75	W	I	-0.46	0.18	0.26	0.64
172	71	72	R	V	-0.38	0.26	0.43	0.64
1892	71	76	D	S	-0.59	0.05	0.3	0.64
1504	71	75	R	I	-0.38	0.27	0.5	0.65
3436	72	75	Y	I	-0.13	0.52	0.79	0.65
1895	71	76	D	C	-0.29	0.37	0.54	0.66
3456	72	75	W	M	-0.59	0.08	0.12	0.67
568	71	73	D	A	-0.58	0.09	0.23	0.67
619	71	73	R	Q	-0.26	0.41	0.6	0.67
2318	72	73	E	K	-0.48	0.19	0.4	0.67
3669	72	76	D	H	-0.28	0.39	0.2	0.67
1998	71	76	M	T	-0.07	0.61	0.84	0.68
578	71	73	D	N	-0.46	0.22	0.66	0.68
183	71	72	R	H	-0.32	0.37	0.12	0.69
2153	71	76	G	N	-0.28	0.41	0.39	0.69
1505	71	75	R	L	-0.44	0.25	0.41	0.69
208	71	72	Q	G	-0.36	0.34	0.16	0.7
4938	73	76	C	T	-0.09	0.61	0.64	0.7
2386	72	73	R	I	-0.33	0.37	0.57	0.7
2341	72	73	D	Q	-0.35	0.36	0.4	0.71
2504	72	73	H	C	-0.15	0.56	0.47	0.71
4939	73	76	C	V	-0.06	0.66	0.74	0.72
334	71	72	F	G	-0.29	0.44	0.02	0.73
174	71	72	R	E	-0.62	0.11	0.27	0.73
582	71	73	D	H	-0.72	0.01	0.36	0.73
1525	71	75	Q	I	-0.11	0.63	0.92	0.74
2339	72	73	D	K	-0.4	0.36	0.47	0.76
127	71	72	D	A	-0.54	0.23	0.06	0.77
1630	71	75	H	I	-0.07	0.71	0.74	0.78
144	71	72	D	W	-0.4	0.38	0.51	0.78
4508	73	75	C	L	-0.27	0.51	0.66	0.78
5057	73	76	Q	Y	-0.3	0.48	0.71	0.78
1900	71	76	D	Q	-0.45	0.33	0.68	0.78
175	71	72	R	D	-0.53	0.26	0.15	0.79
1888	71	76	E	G	-0.75	0.04	0.01	0.79
2420	72	73	N	C	-0.18	0.62	0.69	0.8
576	71	73	D	R	-0.67	0.14	0.57	0.81
134	71	72	D	K	-0.35	0.47	0.67	0.82
3655	72	76	D	A	-0.14	0.68	0.49	0.82
3226	72	75	D	I	-0.46	0.36	0.33	0.82
1904	71	76	D	L	-0.45	0.39	0.58	0.84
2815	72	74	R	A	-0.62	0.23	0.02	0.85
1909	71	76	D	G	-0.47	0.39	0.05	0.86
1870	71	76	E	A	-0.79	0.07	0.2	0.86
4760	73	75	Y	L	-0.32	0.54	0.76	0.86
4720	73	75	H	F	-0.66	0.2	0.54	0.86
179	71	72	R	N	-0.35	0.53	0.67	0.88
1893	71	76	D	T	-0.72	0.16	0.38	0.88
3767	72	76	M	K	-0.18	0.71	0.14	0.89
5160	73	76	H	H	0	0.89	0.8	0.89
834	71	73	G	H	-0.6	0.3	0.01	0.9
5162	73	76	H	Y	-0.29	0.61	0.6	0.9
2794	72	74	K	A	-0.38	0.52	0.39	0.9
136	71	72	D	Q	-0.49	0.42	0.12	0.91
575	71	73	D	K	-0.77	0.14	0.35	0.91
4264	73	74	H	A	-0.74	0.17	0.51	0.91
827	71	73	G	K	-0.65	0.29	0.13	0.94
1879	71	76	E	Q	-0.72	0.22	0.42	0.94
5848	74	76	E	Q	-0.65	0.3	0.23	0.95
1970	71	76	Q	Y	-0.21	0.75	0.97	0.96
129	71	72	D	T	-0.5	0.48	0.29	0.98
4159	73	74	Q	A	-0.75	0.24	0.11	0.99
4762	73	75	Y	F	-0.73	0.26	0.44	0.99
585	71	73	D	W	-0.96	0.03	0.39	0.99
4590	73	75	R	M	-0.86	0.14	0.21	1
583	71	73	D	F	-0.72	0.32	0.59	1.04
1902	71	76	D	M	-0.56	0.49	0.56	1.05
3271	72	75	R	F	-0.53	0.52	0.69	1.05
554	71	73	E	K	-1.04	0.01	0.35	1.05
572	71	73	D	C	-0.74	0.31	0.69	1.05
1462	71	75	D	I	-0.84	0.22	0.5	1.06
2808	72	74	K	H	-0.73	0.34	0.05	1.07
584	71	73	D	Y	-0.79	0.29	0.67	1.08
114	71	72	E	R	-0.87	0.22	0.43	1.09
561	71	73	E	H	-0.99	0.1	0.48	1.09
2149	71	76	G	D	-0.6	0.5	0.17	1.1
1891	71	76	D	A	-0.52	0.58	0.81	1.1
4758	73	75	Y	M	-0.98	0.13	0.21	1.11
135	71	72	D	R	-0.59	0.53	0.73	1.12
4737	73	75	F	M	-0.91	0.21	0.44	1.12
3251	72	75	K	Y	-1.4	0.16	0.28	1.15
2796	72	74	K	T	-0.92	0.23	0.07	1.15
3934	72	76	P	D	-0.48	0.68	0.28	1.16
3946	72	76	P	G	-0.24	0.95	0.36	1.19
4594	73	75	R	F	-0.61	0.63	1.03	1.24
2795	72	74	K	S	-0.86	0.39	0.24	1.25
1884	71	76	E	H	-0.93	0.33	0.97	1.26
4278	73	74	H	H	-1.09	0.2	0.22	1.29
4700	73	75	L	Y	-1.7	0.01	0.38	1.3
1905	71	76	D	H	-0.65	0.7	0.86	1.35
1886	71	76	E	Y	-1.22	0.16	0.28	1.38
1906	71	76	D	F	-0.86	0.52	0.77	1.38
3272	72	75	R	Y	-1.63	0.19	0.21	1.41
564	71	73	E	W	-1.24	0.2	0.44	1.44
555	71	73	E	R	-0.95	0.5	0.8	1.45
4658	73	75	M	Y	-1.78	0.08	0.49	1.45
4316	73	74	Y	N	-2.23	0.05	0.67	1.47
111	71	72	E	E	-1.35	0.13	0.03	1.48
4307	73	74	Y	S	-1.3	0.19	0.55	1.49
2816	72	74	R	S	-1.1	0.4	0.23	1.5
4763	73	75	Y	Y	-1.83	0.08	0.5	1.5
4275	73	74	H	M	-1.1	0.41	0.54	1.51
4148	73	74	R	N	-2.11	0.23	0.38	1.53
4064	73	74	C	N	-2.18	0.16	0.33	1.53
4499	73	75	C	C	-1.65	0.18	0.3	1.55
1907	71	76	D	Y	-0.94	0.65	0.89	1.59
4265	73	74	H	S	-1.23	0.36	0.68	1.59
4742	73	75	F	Y	-1.76	0.24	0.36	1.59
4751	73	75	Y	C	-1.7	0.26	0.72	1.68
4730	73	75	F	C	-1.64	0.34	0.53	1.69
1898	71	76	D	K	-1.19	0.57	0.67	1.76
4118	73	74	K	S	-1.28	0.49	0.2	1.77
4595	73	75	R	Y	-1.71	0.48	0.79	1.78
996	71	74	E	R	-1.7	0.14	0.04	1.84
1899	71	76	D	R	-1.35	0.5	0.62	1.85
4574	73	75	K	Y	-1.81	0.47	0.7	1.87
4772	73	75	W	C	-1.88	0.31	0.46	1.9
1877	71	76	E	K	-1.46	0.54	0.84	2
1878	71	76	E	R	-1.63	0.63	0.78	2.26
